# Supplementary material
Source: ML conference proceedings conference paper supplement (https://openaccess.thecvf.com/content/CVPR2023/html/Huang_Self-Supervised_AutoFlow_CVPR_2023_paper.html)
Supplement: Supplementary file 1 [file Huang_Self-Supervised_AutoFlow_CVPR_2023_supplemental.pdf]

# Self-supervised AutoFlow

## Supplementary Materials

We first discuss implementation and experiment details. Next, we present the ablation studies of our approach. Third, we provide additional analysis of the proposed design. Finally, we include more visual results.

### A. Implementation Details

**Training details.** We use 80k training steps for the rendering hyperparameter search. We include the following rendering hyperparameters for generating the S-AF data:

- Number of foreground objects
- Scale, rotation, translation, grid strength, grid size of the motion for foreground
- Scale, rotation, translation, grid strength, grid size of the motion for background
- Probability and strength of the mask blur
- Probability and strength of the motion blur
- Probability, density and brightness of the fog
- Minimum and maximum of the object’s diagonal
- Minimum and maximum of the object’s center location
- Irregularity and spikiness of the polygon

As for the hyperparameters in the search metric Eq. (2) in the main paper, we use  $(w_{\text{smooth}}, w_{\text{distill}})=(0.6, 4)$  for the Sintel [1] and the DAVIS dataset [3], and  $(w_{\text{smooth}}, w_{\text{distill}})=(1.2, 8)$  for the KITTI dataset [2]. We pretrain the model on a generated S-AF dataset  $\mathbf{D}_{\text{auto}}$  for 3.2M iterations for Sintel and 200k iterations for KITTI and DAVIS. We randomly crop input images to size  $368 \times 496$  at training time and use a batch size of 36.

We further fine-tune the model with the self-supervised loss (Eq. (3)) for 12k iterations on the Sintel dataset, 75k iterations on the KITTI dataset, and 100k iterations on the Davis dataset. We further apply the multi-frame fine-tuning on Sintel and KITTI datasets for 30k iterations (Eq. (4)) with the same parameter setting from SMURF [4]. We randomly crop input images to size  $368 \times 496$  at training time and use a batch size of 8. We use the data augmentations from RAFT [5] including random cropping, stretching, scaling, flipping, and erasing. As for the photometric augmentations, we randomly adjust the contrast, saturation, brightness and hue.

**Evaluation metrics.** We use the average end-point error (AEPE) evaluation metric. For KITTI, we additionally report the outlier rate (Fl-all), *i.e.* the ratio (in %) of outlier pixels among all ground truth pixels. If an error of a pixel exceeds the 3-pixel threshold and 5% w.r.t. the ground truth, the pixel is considered as an outlier.

### B. Ablation Studies

#### B.1. Training by individual S-AF dataset and mixed S-AF dataset

As described in Sec. 3.2 and Sec. 4.2, to improve the robustness of the algorithm, we sort the sets of hyperparameters returned by Self-AutoFlow according to the self-supervised search metric and choose the top-3 hyperparameter sets. We form our final Self-AutoFlow dataset by equally mixing a set of images generated from each hyperparameter set. For a fair comparison, we also prepare an equivalent model for AutoFlow, denoted as AF-mix. In addition to the results of training on the dataset generated by mixing the top-3 hyperparameters in Tab. 1, we report the results of training models on each individual S-AF and AF dataset in Tab. B.1. The models are trained for 0.2M iterations. We note that the top hyperparameters sets are selected according to the search, where the model is trained for 40K iterations, and here we report the results of models trained for 0.2M iterations, so the top-1 hyperparameters might not have the lowest AEPE for AF models.

Unlike supervised AutoFlow, the results of S-AF trained on the top-2 hyperparameters on Sintel Final and S-AF trained on the top-3 hyperparameters on KITTI show that there is no guarantee that the top candidates returned by self-supervised AutoFlow are the optimal set of hyperparameters. Mixing the top-3 datasets decreases the likelihood of sampling a set of poor-performing AutoFlow hyperparameters and improves the robustness of the algorithm.

Table B.1. **Training by individual S-AF dataset and mixed S-AF dataset.** We show that training on mix-3 datasets decreases the likelihood of sampling a poor-performing AutoFlow hyperparameters and improves the robustness of the algorithm.

| Method        | Sintel Clean [1] |       |       |       | Sintel Final [1] |             |       |       | KITTI 2015 [2] |       |             |       |
|---------------|------------------|-------|-------|-------|------------------|-------------|-------|-------|----------------|-------|-------------|-------|
|               | top-1            | top-2 | top-3 | mix-3 | top-1            | top-2       | top-3 | mix-3 | top-1          | top-2 | top-3       | mix-3 |
| AF-mix (0.2M) | 2.11             | 2.18  | 2.10  | 2.18  | 2.85             | 2.83        | 2.82  | 2.83  | 4.70           | 4.35  | 4.58        | 4.43  |
| S-AF (0.2M)   | 2.16             | 2.14  | 2.13  | 2.22  | 2.83             | <b>2.93</b> | 2.84  | 2.84  | 4.65           | 4.06  | <b>5.40</b> | 4.58  |

## B.2. Sequence losses in the search metric of S-AF

In Sec. 3.2, we mention that since there is no backpropagation to the model in the search of AutoFlow, the search metric uses only the final flow prediction of RAFT instead of all intermediate. In Fig. B.1, we conduct a study using the intermediate predictions of RAFT to compute the search metric. Specifically, we compute the search metric once for each intermediate prediction and we exponentially decay the weight for earlier predictions [4]. Since the search metric is computed at the original resolution of the target data, we use at most the last four predictions due to memory constraints.

We conduct the S-AF search using last-1 prediction (ours), last-2 prediction, and last-4 prediction as the search metric. We report the average AEPE of the top-3 models selected by the search metric. The models are trained for 40k iterations in the search. Empirically, we find that using the intermediate predictions in the search metric results in a higher AEPE and does not improve the S-AF search.

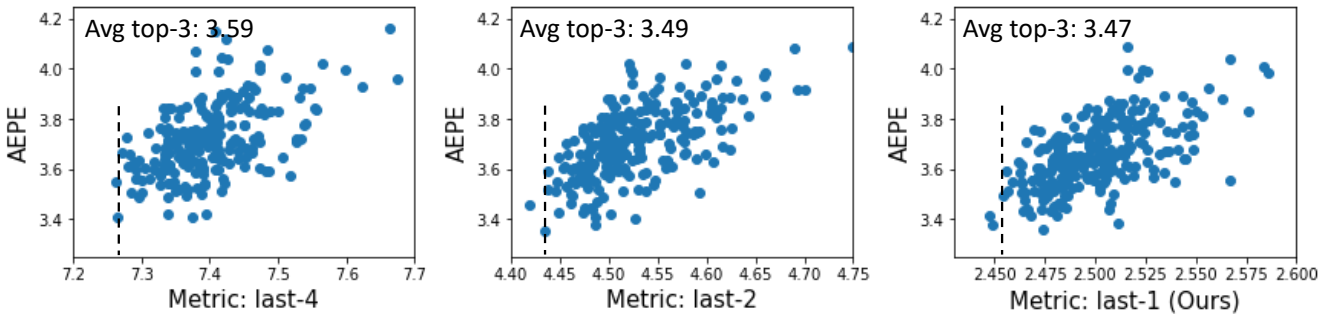

Figure B.1. **Sequence losses.** We find that using the intermediate predictions of RAFT to compute the search metric does not lead to a better set of S-AF hyperparameters.

## C. Analysis and Discussion

Motion statistics of S-AF and AF We compute the statistics of the motion magnitude of the generated optical flow ground truth in S-AF and AF datasets in Fig. C.1. We find that when the target dataset is Sintel, the motion statistics of S-AF are similar to the statistics of Sintel data. In contrast, the motion statistics of AutoFlow are different from the Sintel data. In addition, S-AF focuses more on small motion compared to AF which focuses on the middle-range motion. We hypothesize that the self-supervised search metric may have much smaller values for middle/high-range motions compared to AEPE which penalizes significantly on the error at the regions of large motions. Therefore, the S-AF data does not focus on regions with large motions compared to AF. Similar to Tab. B.1, we also show the statistics of each individual S-AF dataset and the mixed dataset. We find the statistics are similar for each individual S-AF data.

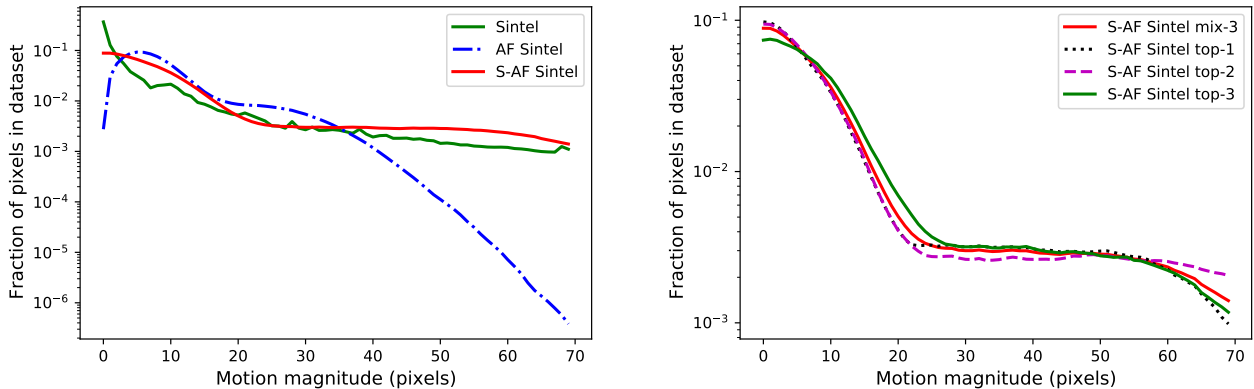

Figure C.1. **Histogram of motion magnitude.** We include the motion statistics of the generated flow field by Self-AutoFlow and AutoFlow. Interestingly, the Self-AutoFlow data focuses more on small motion compared to AutoFlow. Also, the statistics of Self-AutoFlow are closer to the statistics of Sintel data. In addition, we show the statistics of individual S-AF dataset and their mixed results.

### C.1. AEPE versus self-supervised losses of SMURF and S-AF

We calculate the self-supervised losses and the AEPE on the target datasets for SMURF and S-AF models in Tab. C.1. The losses and errors are computed for the full target datasets and we report the average. In most cases, the SMURF models have lower self-supervised losses compared to the S-AF models, while the S-AF models have lower AEPE.

Although the self-supervised metric is highly correlated with the AEPE, optimizing it *directly* by backpropagation to the model might lead to a model with lower self-supervised loss and higher EPE. In contrast, our Self-AutoFlow method uses the self-supervised loss *indirectly* to assess the quality of a generated dataset, which results in a model with higher self-supervised loss and lower EPE. To conclude, Self-AutoFlow is a good strategy for using self-supervised losses.

Table C.1. **Self-supervised losses versus AEPE.** We compute the photometric, distillation and smoothness loss averaged on the training set. We show that our S-AF model which uses the self-supervised loss *indirectly* to assess the quality of a generated dataset results in a model with higher self-supervised loss and lower EPE.

| Method           | Sintel Final [1]                        |                                           |                                          |                                         |                   | KITTI 2015 [2]                          |                                           |                                          |                                         |                   |
|------------------|-----------------------------------------|-------------------------------------------|------------------------------------------|-----------------------------------------|-------------------|-----------------------------------------|-------------------------------------------|------------------------------------------|-----------------------------------------|-------------------|
|                  | $\mathcal{L}_{\text{photo}} \downarrow$ | $\mathcal{L}_{\text{distill}} \downarrow$ | $\mathcal{L}_{\text{smooth}} \downarrow$ | $\mathcal{L}_{\text{total}} \downarrow$ | AEPE $\downarrow$ | $\mathcal{L}_{\text{photo}} \downarrow$ | $\mathcal{L}_{\text{distill}} \downarrow$ | $\mathcal{L}_{\text{smooth}} \downarrow$ | $\mathcal{L}_{\text{total}} \downarrow$ | AEPE $\downarrow$ |
| SMURF Chairs [4] | 2.20                                    | 0.70                                      | <b>0.013</b>                             | 2.92                                    | 3.35              | 2.61                                    | <b>1.05</b>                               | <b>0.0046</b>                            | <b>3.67</b>                             | 7.94              |
| S-AF             | 2.20                                    | <b>0.44</b>                               | 0.017                                    | <b>2.66</b>                             | <b>2.57</b>       | <b>2.54</b>                             | 1.24                                      | 0.0052                                   | 3.78                                    | <b>4.28</b>       |
| +SS Sintel/KITTI |                                         |                                           |                                          |                                         |                   |                                         |                                           |                                          |                                         |                   |
| SMURF [4]        | <b>2.17</b>                             | 0.67                                      | <b>0.012</b>                             | <b>2.86</b>                             | 2.80              | 2.54                                    | <b>0.80</b>                               | 0.0046                                   | <b>3.35</b>                             | 2.01              |
| S-AF             | 2.20                                    | <b>0.65</b>                               | 0.013                                    | 2.87                                    | <b>2.40</b>       | <b>2.49</b>                             | 0.87                                      | <b>0.0043</b>                            | 3.37                                    | <b>1.94</b>       |

## D. Additional Results

### D.1. Visualization of keypoint propagation on BADJA

We visualize the keypoint propagation results on BADJA sequences by SMURF and our S-AF in Fig. D.1. The keypoints correctly propagated are marked as a dot, and the keypoints with the wrong predicted trajectory are marked as a cross. Compared the results without self-supervised fine-tuning, S-AF tracks the three keypoints on the back (gray), left ear (red), and right ear (brown) correctly. On the other hand, SMURF loses the keypoint on the right ear (brown) since the second frame and loses the keypoint on the back (gray) since the third frame in the dog sequence. As for the models with self-supervised fine-tuning, we show the keypoint in the horsejump-low sequence. S-AF correctly predicts the trajectory of the purple keypoint on the tail, while SMURF loses it since the second frame.

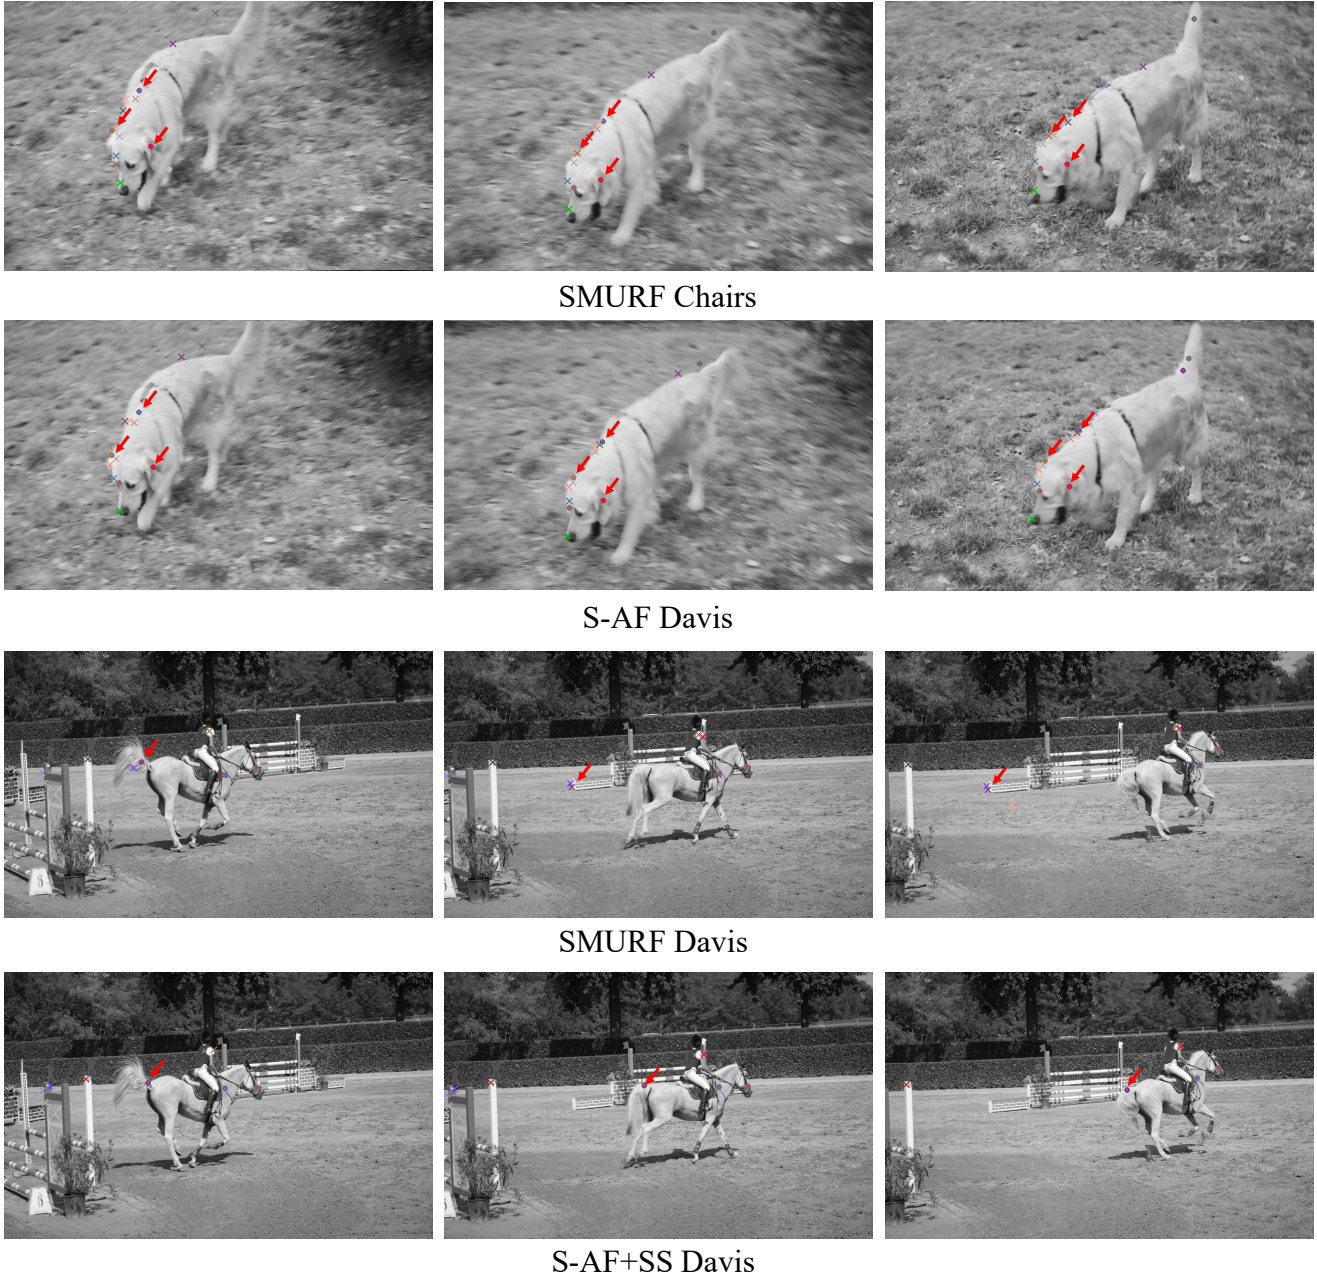

Figure D.1. **Visual results of keypoints on BADJA.** The keypoints correctly tracked are marked as a dot, and the keypoints with the wrong trajectory are marked as a cross. Compared the results without self-supervised fine-tuning in (a), S-AF tracks the three keypoints (gray, red, and brown) correctly, while SMURF loses the brown keypoint in the second frame and the gray keypoint in the third frame. As for the results with self-supervised fine-tuning, S-AF correctly tracks the purple keypoint on the tail, and SMURF loses it since the second frame.

## D.2. Benchmark results

We provide the screenshots of both models on the public benchmarks in Fig. D.2 and Fig. D.3. As listed in Tab. 3, we provide the detailed performance of our S-AF+SS models on public benchmarks in Tab. D.1. The S-AF+SS model is more accurate in most cases while less accurate on unmatched and s0-10 for Sintel benchmark, and on F1-fg all for KITTI benchmark compared to SMURF. As shown in Tab. 5, we show the detailed performance of the supervised fine-tuning model RAFT-S-AF in Tab. D.2. For KITTI benchmark, RAFT-S-AF is more accurate in most cases while less accurate for F1-fg. RAFT-S-AF is more accurate for all cases for Sintel Clean and Sintel Final.

|                                 |              |              |               |              |              |              |              |              |               |                                   |
|---------------------------------|--------------|--------------|---------------|--------------|--------------|--------------|--------------|--------------|---------------|-----------------------------------|
| SfM-PM <sup>[116]</sup>         | 2.910        | 1.016        | 18.357        | 2.797        | 0.756        | 0.479        | 0.559        | 1.732        | 17.431        | <a href="#">Visualize Results</a> |
| FlowFields++ <sup>[117]</sup>   | 2.943        | 0.850        | 20.027        | 2.550        | 0.603        | 0.403        | 0.560        | 1.859        | 17.401        | <a href="#">Visualize Results</a> |
| GCA-Net <sup>[118]</sup>        | 2.947        | 1.032        | 18.585        | 2.900        | 0.830        | 0.456        | 0.602        | 1.645        | 17.753        | <a href="#">Visualize Results</a> |
| LiteFlowNet3 <sup>[119]</sup>   | 2.994        | 1.148        | 18.077        | 3.000        | 0.985        | 0.498        | 0.559        | 1.670        | 18.302        | <a href="#">Visualize Results</a> |
| ricom20201202 <sup>[120]</sup>  | 3.002        | 1.150        | 18.125        | 2.915        | 0.911        | 0.609        | 0.723        | 1.949        | 16.869        | <a href="#">Visualize Results</a> |
| rise <sup>[121]</sup>           | 3.005        | 1.150        | 18.147        | 2.930        | 0.908        | 0.607        | 0.721        | 1.957        | 16.885        | <a href="#">Visualize Results</a> |
| <b>RAFT-SA<sup>[122]</sup></b>  | <b>3.026</b> | <b>1.122</b> | <b>18.578</b> | <b>2.577</b> | <b>0.988</b> | <b>0.579</b> | <b>0.410</b> | <b>1.191</b> | <b>20.477</b> | <a href="#">Visualize Results</a> |
| LiteFlowNet3-S <sup>[123]</sup> | 3.028        | 1.173        | 18.182        | 3.079        | 0.996        | 0.527        | 0.574        | 1.646        | 18.566        | <a href="#">Visualize Results</a> |
| RICBCDN <sup>[124]</sup>        | 3.080        | 1.212        | 18.319        | 3.241        | 0.945        | 0.577        | 0.724        | 2.077        | 17.197        | <a href="#">Visualize Results</a> |
| FlowFields+ <sup>[125]</sup>    | 3.102        | 0.820        | 21.718        | 2.340        | 0.616        | 0.373        | 0.593        | 1.865        | 18.549        | <a href="#">Visualize Results</a> |
| DIP-Flow <sup>[126]</sup>       | 3.103        | 0.881        | 21.227        | 2.574        | 0.681        | 0.419        | 0.548        | 1.801        | 18.979        | <a href="#">Visualize Results</a> |
| PST <sup>[127]</sup>            | 3.110        | 0.942        | 20.809        | 2.759        | 0.664        | 0.378        | 0.635        | 2.069        | 17.919        | <a href="#">Visualize Results</a> |
| MPIF <sup>[128]</sup>           | 3.111        | 1.134        | 19.218        | 3.070        | 0.939        | 0.523        | 0.616        | 1.980        | 18.220        | <a href="#">Visualize Results</a> |
| LSM_FLOW_RVC <sup>[129]</sup>   | 3.142        | 1.395        | 17.394        | 2.557        | 1.091        | 0.873        | 0.361        | 1.202        | 21.652        | <a href="#">Visualize Results</a> |
| SMURF <sup>[130]</sup>          | 3.152        | 1.550        | 16.233        | 3.141        | 1.310        | 0.858        | 0.398        | 1.371        | 21.152        | <a href="#">Visualize Results</a> |

(a) Sintel Clean

|                                 |              |              |               |              |              |              |              |              |               |                                   |
|---------------------------------|--------------|--------------|---------------|--------------|--------------|--------------|--------------|--------------|---------------|-----------------------------------|
| RAFT+ConvUp <sup>[93]</sup>     | 3.642        | 1.661        | 19.796        | 3.372        | 1.258        | 1.096        | 0.732        | 2.054        | 21.920        | <a href="#">Visualize Results</a> |
| CVPR-1235 <sup>[94]</sup>       | 3.649        | 1.912        | 17.818        | 3.857        | 1.576        | 1.144        | 0.823        | 2.965        | 19.311        | <a href="#">Visualize Results</a> |
| DCVNet <sup>[95]</sup>          | 3.655        | 1.986        | 17.243        | 3.822        | 1.556        | 1.296        | 0.772        | 2.409        | 20.937        | <a href="#">Visualize Results</a> |
| STaRFlow <sup>[96]</sup>        | 3.707        | 1.838        | 18.946        | 3.618        | 1.439        | 1.122        | 0.744        | 2.018        | 22.491        | <a href="#">Visualize Results</a> |
| C-RAFT_RVC <sup>[97]</sup>      | 3.795        | 1.919        | 19.089        | 3.591        | 1.660        | 1.236        | 0.674        | 2.369        | 22.723        | <a href="#">Visualize Results</a> |
| Flow1D <sup>[98]</sup>          | 3.806        | 1.949        | 18.946        | 3.604        | 1.756        | 1.394        | 0.738        | 2.479        | 22.221        | <a href="#">Visualize Results</a> |
| <b>RAFT-SA<sup>[99]</sup></b>   | <b>3.977</b> | <b>1.889</b> | <b>21.005</b> | <b>3.995</b> | <b>1.575</b> | <b>1.077</b> | <b>0.889</b> | <b>2.234</b> | <b>23.527</b> | <a href="#">Visualize Results</a> |
| IOFPL-CV8-ft <sup>[100]</sup>   | 4.014        | 1.906        | 21.194        | 3.246        | 1.418        | 1.374        | 0.656        | 1.905        | 25.767        | <a href="#">Visualize Results</a> |
| ADW-Net <sup>[101]</sup>        | 4.017        | 1.951        | 20.855        | 3.720        | 1.472        | 1.308        | 0.818        | 2.442        | 23.694        | <a href="#">Visualize Results</a> |
| DistillFlow+ft <sup>[102]</sup> | 4.095        | 2.031        | 20.934        | 4.300        | 1.666        | 1.236        | 0.673        | 2.448        | 25.068        | <a href="#">Visualize Results</a> |
| ScopeFlow <sup>[103]</sup>      | 4.098        | 1.999        | 21.214        | 4.028        | 1.689        | 1.180        | 0.725        | 2.589        | 24.477        | <a href="#">Visualize Results</a> |
| ARFlow-mv-ft <sup>[104]</sup>   | 4.142        | 2.082        | 20.937        | 4.056        | 1.707        | 1.300        | 0.706        | 2.366        | 25.475        | <a href="#">Visualize Results</a> |
| vcn+MSDRNet <sup>[105]</sup>    | 4.143        | 1.999        | 21.621        | 3.932        | 1.637        | 1.266        | 0.763        | 2.387        | 25.165        | <a href="#">Visualize Results</a> |
| LSM_FLOW_RVC <sup>[106]</sup>   | 4.150        | 2.018        | 21.531        | 3.470        | 1.600        | 1.478        | 0.606        | 1.840        | 27.323        | <a href="#">Visualize Results</a> |
| MaskFlowNet <sup>[107]</sup>    | 4.172        | 2.048        | 21.494        | 3.783        | 1.745        | 1.310        | 0.592        | 2.389        | 26.253        | <a href="#">Visualize Results</a> |
| SMURF <sup>[108]</sup>          | 4.183        | 2.138        | 20.861        | 4.198        | 1.744        | 1.296        | 0.740        | 2.302        | 25.819        | <a href="#">Visualize Results</a> |

(b) Sintel Final

|                                                                                                                                                                                                                                                              |                       |  |      |               |                |               |                 |            |                                 |                          |
|--------------------------------------------------------------------------------------------------------------------------------------------------------------------------------------------------------------------------------------------------------------|-----------------------|--|------|---------------|----------------|---------------|-----------------|------------|---------------------------------|--------------------------|
| 100                                                                                                                                                                                                                                                          | VCN                   |  | code | 5.83 %        | 8.66 %         | 6.30 %        | 100.00 %        | 0.18 s     | Titan X Pascal                  | <input type="checkbox"/> |
| G. Yang and D. Ramanan: <a href="#">Volumetric Correspondence Networks for Optical Flow</a> . NeurIPS 2019.                                                                                                                                                  |                       |  |      |               |                |               |                 |            |                                 |                          |
| 101                                                                                                                                                                                                                                                          | Stereo expansion      |  | code | 5.83 %        | 8.66 %         | 6.30 %        | 100.00 %        | 2 s        | GPU @ 2.5 Ghz (Python)          | <input type="checkbox"/> |
| G. Yang and D. Ramanan: <a href="#">Upgrading Optical Flow to 3D Scene Flow through Optical Expansion</a> . CVPR 2020.                                                                                                                                       |                       |  |      |               |                |               |                 |            |                                 |                          |
| 102                                                                                                                                                                                                                                                          | Binary TTC            |  |      | 5.84 %        | 8.67 %         | 6.31 %        | 100.00 %        | 2 s        | GPU @ 1.0 Ghz (Python)          | <input type="checkbox"/> |
| A. Badki, O. Gallo, J. Kautz and P. Sen: <a href="#">Binary TTC: A Temporal Geofence for Autonomous Navigation</a> . The IEEE Conference on Computer Vision and Pattern Recognition (CVPR) 2021.                                                             |                       |  |      |               |                |               |                 |            |                                 |                          |
| 103                                                                                                                                                                                                                                                          | MonoComb              |  |      | 5.84 %        | 8.67 %         | 6.31 %        | 100.00 %        | 0.58 s     | RTX 2080 Ti                     | <input type="checkbox"/> |
| R. Schuster, C. Unger and D. Stricker: <a href="#">MonoComb: A Sparse-to-Dense Combination Approach for Monocular Scene Flow</a> . ACM Computer Science in Cars Symposium (CSCS) 2020.                                                                       |                       |  |      |               |                |               |                 |            |                                 |                          |
| 104                                                                                                                                                                                                                                                          | HD <sup>3</sup> -Flow |  | code | 6.05 %        | 9.02 %         | 6.55 %        | 100.00 %        | 0.10 s     | NVIDIA Pascal Titan XP          | <input type="checkbox"/> |
| Z. Yin, T. Darrell and F. Yu: <a href="#">Hierarchical Discrete Distribution Decomposition for Match Density Estimation</a> . CVPR 2019.                                                                                                                     |                       |  |      |               |                |               |                 |            |                                 |                          |
| 105                                                                                                                                                                                                                                                          | PRSM                  |  | code | 5.33 %        | 13.40 %        | 6.68 %        | 100.00 %        | 300 s      | 1 core @ 2.5 Ghz (C/C++)        | <input type="checkbox"/> |
| C. Vogel, K. Schindler and S. Roth: <a href="#">3D Scene Flow Estimation with a Piecewise Rigid Scene Model</a> . Ijcv 2015.                                                                                                                                 |                       |  |      |               |                |               |                 |            |                                 |                          |
| 106                                                                                                                                                                                                                                                          | <b>RAFT-SA</b>        |  | code | <b>5.90 %</b> | <b>11.09 %</b> | <b>6.76 %</b> | <b>100.00 %</b> | <b>1 s</b> | <b>1 core @ 2.5 Ghz (C/C++)</b> | <input type="checkbox"/> |
| 107                                                                                                                                                                                                                                                          | MaskFlowNet-S         |  | code | 6.53 %        | 8.21 %         | 6.81 %        | 100.00 %        | 0.03 s     | NVIDIA TITAN Xp                 | <input type="checkbox"/> |
| S. Zhao, Y. Sheng, Y. Dong, E. Chang and Y. Xu: <a href="#">MaskFlowNet: Asymmetric Feature Matching with Learnable Occlusion Mask</a> . Proceedings of the IEEE Conference on Computer Vision and Pattern Recognition (CVPR) 2020.                          |                       |  |      |               |                |               |                 |            |                                 |                          |
| 108                                                                                                                                                                                                                                                          | ScopeFlow             |  | code | 6.72 %        | 7.36 %         | 6.82 %        | 100.00 %        | -1 s       | Nvidia GPU                      | <input type="checkbox"/> |
| A. Bar-Haim and L. Wolf: <a href="#">ScopeFlow: Dynamic Scene Scoping for Optical Flow</a> . The IEEE Conference on Computer Vision and Pattern Recognition (CVPR) 2020.                                                                                     |                       |  |      |               |                |               |                 |            |                                 |                          |
| 109                                                                                                                                                                                                                                                          | SMURF                 |  | code | 6.04 %        | 10.75 %        | 6.83 %        | 100.00 %        | .2 s       | 1 core @ 2.5 Ghz (C/C++)        | <input type="checkbox"/> |
| A. Stone, D. Maurer, A. Ayvaci, A. Angelova and R. Jonschkowski: <a href="#">SMURF: Self-Teaching Multi-Frame Unsupervised RAFT With Full-Image Warping</a> . Proceedings of the IEEE/CVF Conference on Computer Vision and Pattern Recognition (CVPR) 2021. |                       |  |      |               |                |               |                 |            |                                 |                          |
| 110                                                                                                                                                                                                                                                          | RAFT-VM               |  |      | 6.49 %        | 8.65 %         | 6.85 %        | 100.00 %        | 0.4 s      | GPU @ 2.5 Ghz (C/C++)           | <input type="checkbox"/> |
| 111                                                                                                                                                                                                                                                          | OSF+TC                |  |      | 5.76 %        | 13.31 %        | 7.02 %        | 100.00 %        | 50 min     | 1 core @ 2.5 Ghz (C/C++)        | <input type="checkbox"/> |
| M. Neoral and J. Šochman: <a href="#">Object Scene Flow with Temporal Consistency</a> . 22nd Computer Vision Winter Workshop (CWW) 2017.                                                                                                                     |                       |  |      |               |                |               |                 |            |                                 |                          |
| 112                                                                                                                                                                                                                                                          | IRR-full              |  |      | 6.99 %        | 7.57 %         | 7.09 %        | 100.00 %        | 0.2 s      | 1 core @ 2.5 Ghz (Python)       | <input type="checkbox"/> |

(c) KITTI

Figure D.2. Screenshot of S-AF+SS on public benchmark. Our method was temporarily named as RAFT-SA.

|                      |              |              |              |              |              |              |              |              |              |                                   |
|----------------------|--------------|--------------|--------------|--------------|--------------|--------------|--------------|--------------|--------------|-----------------------------------|
| GMA [19]             | 1.388        | 0.582        | 7.963        | 1.537        | 0.461        | 0.278        | 0.331        | 0.963        | 7.662        | <a href="#">Visualize Results</a> |
| GMFlowNet [20]       | 1.390        | 0.520        | 8.486        | 1.275        | 0.395        | 0.293        | 0.314        | 0.991        | 7.698        | <a href="#">Visualize Results</a> |
| GMA+LCT-Flow [21]    | 1.408        | 0.525        | 8.611        | 1.428        | 0.404        | 0.251        | 0.279        | 0.876        | 8.299        | <a href="#">Visualize Results</a> |
| AGF-Flow3 [22]       | 1.409        | 0.525        | 8.618        | 1.433        | 0.403        | 0.250        | 0.278        | 0.878        | 8.303        | <a href="#">Visualize Results</a> |
| RFPM [23]            | 1.411        | 0.494        | 8.884        | 1.335        | 0.400        | 0.221        | 0.273        | 0.879        | 8.345        | <a href="#">Visualize Results</a> |
| RAFT-OCTC [24]       | 1.419        | 0.541        | 8.574        | 1.455        | 0.442        | 0.242        | 0.301        | 0.940        | 8.118        | <a href="#">Visualize Results</a> |
| <b>RAFT-SA+ [25]</b> | <b>1.421</b> | <b>0.535</b> | <b>8.654</b> | <b>1.495</b> | <b>0.451</b> | <b>0.207</b> | <b>0.260</b> | <b>0.896</b> | <b>8.460</b> | <a href="#">Visualize Results</a> |
| GMA-FS [26]          | 1.430        | 0.602        | 8.171        | 1.579        | 0.470        | 0.263        | 0.333        | 0.977        | 7.961        | <a href="#">Visualize Results</a> |
| AGFlow [27]          | 1.431        | 0.559        | 8.541        | 1.501        | 0.452        | 0.261        | 0.319        | 0.963        | 8.075        | <a href="#">Visualize Results</a> |
| DIP [28]             | 1.435        | 0.519        | 8.919        | 1.102        | 0.407        | 0.312        | 0.336        | 0.754        | 8.546        | <a href="#">Visualize Results</a> |
| CRAFT [29]           | 1.441        | 0.611        | 8.204        | 1.574        | 0.552        | 0.249        | 0.311        | 0.991        | 8.131        | <a href="#">Visualize Results</a> |
| ErrorMatch-GMA [30]  | 1.446        | 0.584        | 8.472        | 1.503        | 0.483        | 0.280        | 0.311        | 0.935        | 8.314        | <a href="#">Visualize Results</a> |
| GMA-base [31]        | 1.450        | 0.591        | 8.440        | 1.532        | 0.470        | 0.280        | 0.321        | 0.951        | 8.251        | <a href="#">Visualize Results</a> |

(a) Sintel Clean

|                        |              |              |               |              |              |              |              |              |               |                                   |
|------------------------|--------------|--------------|---------------|--------------|--------------|--------------|--------------|--------------|---------------|-----------------------------------|
| RAFT+NCUP [48]         | 2.692        | 1.323        | 13.854        | 3.139        | 1.086        | 0.636        | 0.635        | 1.844        | 14.949        | <a href="#">Visualize Results</a> |
| RAFT-it+ RVC [49]      | 2.696        | 1.317        | 13.929        | 2.486        | 0.929        | 0.839        | 0.440        | 1.456        | 16.880        | <a href="#">Visualize Results</a> |
| ERRN [50]              | 2.701        | 1.348        | 13.744        | 3.164        | 1.109        | 0.666        | 0.647        | 1.854        | 14.943        | <a href="#">Visualize Results</a> |
| CVE-RAFT [51]          | 2.707        | 1.227        | 14.776        | 2.942        | 1.054        | 0.617        | 0.580        | 1.726        | 15.634        | <a href="#">Visualize Results</a> |
| AGF-Flow3 [52]         | 2.733        | 1.217        | 15.105        | 2.419        | 0.912        | 0.737        | 0.463        | 1.440        | 17.133        | <a href="#">Visualize Results</a> |
| GMA+LCT-Flow [53]      | 2.734        | 1.218        | 15.103        | 2.419        | 0.914        | 0.738        | 0.465        | 1.441        | 17.131        | <a href="#">Visualize Results</a> |
| submission5367 [54]    | 2.742        | 1.282        | 14.656        | 3.027        | 1.110        | 0.644        | 0.562        | 1.743        | 15.980        | <a href="#">Visualize Results</a> |
| <b>RAFT-SA+ [55]</b>   | <b>2.749</b> | <b>1.375</b> | <b>13.943</b> | <b>2.634</b> | <b>1.132</b> | <b>0.872</b> | <b>0.469</b> | <b>1.545</b> | <b>16.967</b> | <a href="#">Visualize Results</a> |
| L2L-Flow-ext-warm [56] | 2.780        | 1.319        | 14.697        | 3.098        | 1.145        | 0.637        | 0.656        | 1.879        | 15.502        | <a href="#">Visualize Results</a> |
| LCT-Flow2 [57]         | 2.781        | 1.349        | 14.465        | 2.720        | 0.989        | 0.895        | 0.620        | 1.582        | 16.405        | <a href="#">Visualize Results</a> |
| RAFT-FS [58]           | 2.785        | 1.341        | 14.557        | 3.114        | 1.104        | 0.649        | 0.681        | 1.850        | 15.487        | <a href="#">Visualize Results</a> |
| EMD-L [59]             | 2.790        | 1.260        | 15.258        | 2.629        | 0.981        | 0.837        | 0.537        | 1.595        | 16.856        | <a href="#">Visualize Results</a> |
| MFR [60]               | 2.801        | 1.380        | 14.385        | 3.075        | 1.112        | 0.772        | 0.674        | 1.829        | 15.703        | <a href="#">Visualize Results</a> |
| RAFTwarm+AOIR [61]     | 2.813        | 1.371        | 14.565        | 3.088        | 1.099        | 0.727        | 0.603        | 1.781        | 16.271        | <a href="#">Visualize Results</a> |

(b) Sintel Final

|                                                                                                                                                                                                                                         |                                   |                      |        |         |        |          |        |                                |                          |
|-----------------------------------------------------------------------------------------------------------------------------------------------------------------------------------------------------------------------------------------|-----------------------------------|----------------------|--------|---------|--------|----------|--------|--------------------------------|--------------------------|
| 4                                                                                                                                                                                                                                       | <a href="#">RigidMask+ISE</a>     | <a href="#">code</a> | 2.63 % | 7.85 %  | 3.50 % | 100.00 % | 3.3 s  | GPU @ 2.5 Ghz (Python)         | <input type="checkbox"/> |
| G. Yang and D. Ramanan: <a href="#">Learning to Segment Rigid Motions from Two Frames</a> . CVPR 2021.                                                                                                                                  |                                   |                      |        |         |        |          |        |                                |                          |
| 5                                                                                                                                                                                                                                       | <a href="#">TPCV+RAFT3D</a>       | <a href="#">code</a> | 2.48 % | 10.19 % | 3.76 % | 100.00 % | 0.2 s  | 1 core @ 2.5 Ghz (C/C++)       | <input type="checkbox"/> |
| 6                                                                                                                                                                                                                                       | <a href="#">RAFT-it+ RVC</a>      | <a href="#">code</a> | 3.62 % | 5.33 %  | 3.90 % | 100.00 % | 0.14 s | 1 core @ 2.5 Ghz (Python)      | <input type="checkbox"/> |
| 7                                                                                                                                                                                                                                       | <a href="#">RAFT-OCTC</a>         | <a href="#">code</a> | 3.72 % | 5.39 %  | 4.00 % | 100.00 % | 0.2 s  | GPU @ 2.5 Ghz (Python)         | <input type="checkbox"/> |
| J. Jeong, J. Lin, F. Porikli and N. Kwak: <a href="#">Imposing Consistency for Optical Flow Estimation</a> (Qualcomm AI Research). CVPR 2022.                                                                                           |                                   |                      |        |         |        |          |        |                                |                          |
| 8                                                                                                                                                                                                                                       | <a href="#">SF2SE3</a>            | <a href="#">code</a> | 3.17 % | 8.79 %  | 4.11 % | 100.00 % | 2.7 s  | GPU @ >3.5 Ghz (Python)        | <input type="checkbox"/> |
| L. Sommer, P. Schrippel and T. Brox: <a href="#">SF2SE3: Clustering Scene Flow into SE (3)-Motions via Proposal and Selection</a> . DAGM German Conference on Pattern Recognition 2022.                                                 |                                   |                      |        |         |        |          |        |                                |                          |
| 9                                                                                                                                                                                                                                       | <a href="#">RAFT-CF-PL3</a>       | <a href="#">code</a> | 3.80 % | 5.65 %  | 4.11 % | 100.00 % | 0.05 s | GPU @ 2.5 Ghz (Python)         | <input type="checkbox"/> |
| Z. Zhang, P. Ji, N. Bansal, C. Cai, Q. Yan, X. Xu and Y. Xu: <a href="#">CLIP-Flow: Contrastive Learning by semi-supervised Iterative Pseudo Labeling for Optical Flow Estimation</a> . 2022.                                           |                                   |                      |        |         |        |          |        |                                |                          |
| 10                                                                                                                                                                                                                                      | <a href="#">RAFT-S-AF</a>         | <a href="#">code</a> | 3.86 % | 5.38 %  | 4.12 % | 100.00 % | 1 s    | 1 core @ 2.5 Ghz (C/C++)       | <input type="checkbox"/> |
| 11                                                                                                                                                                                                                                      | <a href="#">MS RAFT+ corr RVC</a> | <a href="#">code</a> | 3.83 % | 5.71 %  | 4.15 % | 100.00 % | 0.65 s | GPU @ 2.5 Ghz (Python + C/C++) | <input type="checkbox"/> |
| A. Jahedi, M. Luz, L. Mehl, M. Rivinius and A. Bruhn: <a href="#">High Resolution Multi-Scale RAFT</a> . Robust Vision Challenge 2022, arXiv preprint arXiv:2210.16900 2022.                                                            |                                   |                      |        |         |        |          |        |                                |                          |
| 12                                                                                                                                                                                                                                      | <a href="#">MS RAFT+ RVC</a>      | <a href="#">code</a> | 3.89 % | 5.67 %  | 4.19 % | 100.00 % | 0.65 s | GPU @ 2.5 Ghz (Python + C/C++) | <input type="checkbox"/> |
| 13                                                                                                                                                                                                                                      | <a href="#">DIP</a>               | <a href="#">code</a> | 3.86 % | 5.96 %  | 4.21 % | 100.00 % | 0.15 s | 1 core @ 2.5 Ghz (Python)      | <input type="checkbox"/> |
| Z. Zheng, N. Nie, Z. Ling, P. Xiong, J. Liu, H. Wang and J. Li: <a href="#">DIP: Deep Inverse Patchmatch for High-Resolution Optical Flow</a> . Proceedings of the IEEE/CVF Conference on Computer Vision and Pattern Recognition 2022. |                                   |                      |        |         |        |          |        |                                |                          |
| 14                                                                                                                                                                                                                                      | <a href="#">RAFT-3D</a>           | <a href="#">code</a> | 3.39 % | 8.79 %  | 4.29 % | 100.00 % | 2 s    | GPU @ 2.5 Ghz (Python + C/C++) | <input type="checkbox"/> |
| Z. Teed and J. Deng: <a href="#">RAFT-3D: Scene Flow using Rigid-Motion Embeddings</a> . arXiv preprint arXiv:2012.00726 2020.                                                                                                          |                                   |                      |        |         |        |          |        |                                |                          |
| 15                                                                                                                                                                                                                                      | <a href="#">RAFT-it</a>           | <a href="#">code</a> | 4.11 % | 5.34 %  | 4.31 % | 100.00 % | 0.1 s  | GPU @ 2.5 Ghz (Python)         | <input type="checkbox"/> |
| 16                                                                                                                                                                                                                                      | <a href="#">RCA-Flow</a>          | <a href="#">code</a> | 3.96 % | 6.21 %  | 4.33 % | 100.00 % | 0.16 s | 1 core @ 2.5 Ghz (Python)      | <input type="checkbox"/> |

(c) KITTI

Figure D.3. Screenshot of the supervised fine-tuning results of S-AF on public benchmark. Our method was temporarily named as RAFT-SA+ and RAFT-S-AF.

Table D.1. Detailed performance of S-AF+SS on public benchmark.

| Model   | all  | match | unmatch | d0-10 | d10-60 | d60-140 | s0-10 | s10-40 | s40+  |
|---------|------|-------|---------|-------|--------|---------|-------|--------|-------|
| SMURF   | 3.15 | 1.55  | 16.23   | 3.14  | 1.31   | 0.86    | 0.40  | 1.37   | 21.15 |
| S-AF+SS | 3.03 | 1.12  | 18.58   | 2.58  | 0.99   | 0.58    | 0.41  | 1.19   | 20.48 |

(a) Sintel Clean

| Model   | all  | match | unmatch | d0-10 | d10-60 | d60-140 | s0-10 | s10-40 | s40+  |
|---------|------|-------|---------|-------|--------|---------|-------|--------|-------|
| SMURF   | 4.18 | 2.14  | 20.86   | 4.20  | 1.74   | 1.30    | 0.74  | 2.30   | 25.82 |
| S-AF+SS | 3.98 | 1.89  | 21.01   | 4.00  | 1.58   | 1.08    | 0.89  | 2.23   | 23.53 |

(b) Sintel Final

| Model   | All    |         |        | Occ    |        |        |
|---------|--------|---------|--------|--------|--------|--------|
|         | F1-bg  | F1-fg   | F1-all | F1-bg  | F1-fg  | F1-all |
| SMURF   | 6.04 % | 10.75 % | 6.83 % | 4.46 % | 8.86 % | 5.26 % |
| S-AF+SS | 5.90 % | 11.09 % | 6.76 % | 4.41 % | 8.67 % | 5.18 % |

(c) KITTI

Table D.2. Detailed performance of the supervised fine-tuning results of S-AF on public benchmark.

| Model     | all  | match | unmatch | d0-10 | d10-60 | d60-140 | s0-10 | s10-40 | s40+ |
|-----------|------|-------|---------|-------|--------|---------|-------|--------|------|
| RAFT-it   | 1.55 | 0.61  | 9.24    | 1.66  | 0.51   | 0.27    | 0.29  | 0.97   | 9.26 |
| RAFT-S-AF | 1.42 | 0.54  | 8.65    | 1.50  | 0.45   | 0.21    | 0.26  | 0.90   | 8.46 |

(a) Sintel Clean

| Model     | all  | match | unmatch | d0-10 | d10-60 | d60-140 | s0-10 | s10-40 | s40+  |
|-----------|------|-------|---------|-------|--------|---------|-------|--------|-------|
| RAFT-it   | 2.90 | 1.41  | 15.03   | 2.81  | 1.16   | 0.88    | 0.51  | 1.70   | 17.62 |
| RAFT-S-AF | 2.75 | 1.38  | 13.94   | 2.63  | 1.13   | 0.87    | 0.47  | 1.55   | 16.97 |

(b) Sintel Final

| Model     | All    |        |        | Occ    |        |        |
|-----------|--------|--------|--------|--------|--------|--------|
|           | F1-bg  | F1-fg  | F1-all | F1-bg  | F1-fg  | F1-all |
| RAFT-it   | 4.11 % | 5.34 % | 4.31 % | 2.68 % | 2.77 % | 2.70 % |
| RAFT-S-AF | 3.86 % | 5.38 % | 4.12 % | 2.52 % | 2.86 % | 2.59 % |

(c) KITTI

## References

- [1] Daniel J. Butler, Jonas Wulff, Garrett B. Stanley, and Michael J. Black. A naturalistic open source movie for optical flow evaluation. In *ECCV*, 2012. 1, 2, 3
- [2] Moritz Menze, Christian Heipke, and Andreas Geiger. Joint 3D estimation of vehicles and scene flow. In *ISPRS Workshop on Image Sequence Analysis (ISA)*, 2015. 1, 2, 3
- [3] Jordi Pont-Tuset, Federico Perazzi, Sergi Caelles, Pablo Arbeláez, Alexander Sorkine-Hornung, and Luc Van Gool. The 2017 DAVIS challenge on video object segmentation. *arXiv preprint arXiv:1704.00675*, 2017. 1
- [4] Austin Stone, Daniel Maurer, Alper Aytaci, Anelia Angelova, and Rico Jonschkowski. SMURF: Self-teaching multi-frame unsupervised raft with full-image warping. In *CVPR*, 2021. 1, 2, 3
- [5] Zachary Teed and Jia Deng. RAFT: Recurrent all-pairs field transforms for optical flow. In *ECCV*, 2020. 1
